# Supplementary material for: Association of Electronic Health Record Inbasket Message Characteristics With Physician Burnout
Source: PubMed Central journal article supplement (PMC9713605; doi:10.1001/jamanetworkopen.2022.44363), 2022-11-30
Supplement: jamanetwopen-e2244363-s002.pdf [file jamanetwopen-e2244363-s002.pdf]

## Data Sharing Statement

Baxter. Association of Electronic Health Record Inbasket Message Characteristics With Physician Burnout. *JAMA Netw Open*. Published November 30, 2022.

doi:10.1001/jamanetworkopen.2022.44363

### Data

**Data available:** No

### Additional Information

**Explanation for why data not available:** Combinations of the data may be able to identify physicians at our institution with burnout based on demographic characteristics, specialty, etc. Due to the sensitive nature of burnout and medical practice, we did not want to share this data for concern of re-identification.
